# Supplementary material for: Interleukin‐1β exacerbates disease and is a potential therapeutic target to reduce pulmonary inflammation during severe influenza A virus infection
Source: PubMed Central journal article supplement (PMC8453884; doi:10.1111/imcb.12459), 2021-05-20
Supplement: IMCB-99-737-s001.pdf [file IMCB-99-737-s001.pdf]

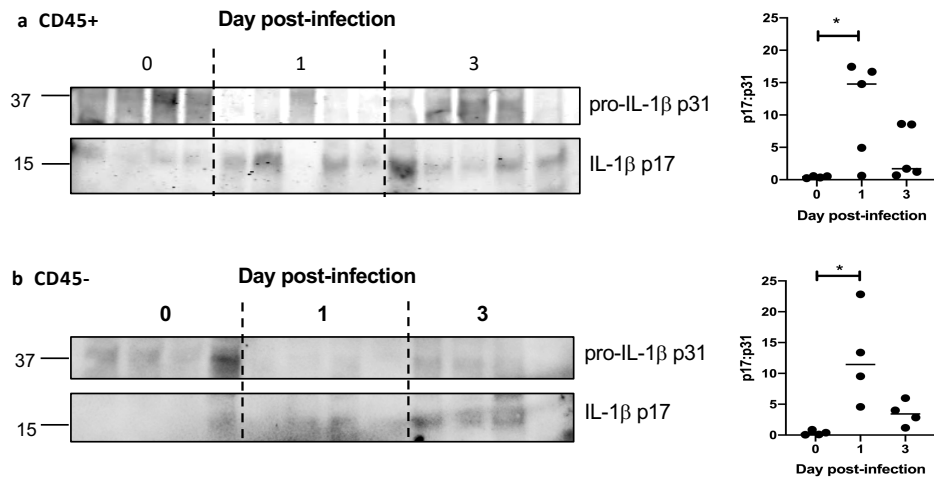

**Supplementary Figure 1. (a-b)** C57BL/6 mice were infected with  $10^5$  PFU of HKx31 and CD45<sup>+</sup> haemopoietic and CD45<sup>-</sup> non-haemopoietic cells were isolated from lungs on day 1 and 3 post-infection. Uninfected control mice were included for comparison (day 0). Immunoblot of pro-IL-1β (p31) and IL-1β (p17) in cell lysates from **(a)** CD45<sup>+</sup> and **(b)** CD45<sup>-</sup> cells. Loading controls did not resolve on the re-probed blots. Expression of p17 (IL-1β) relative to p31 (pro-IL-1β) is shown. \*  $P < 0.05$ ; One-way ANOVA. Data are representative of 2 independent experiments each consisting of 4 or 5 mice per group.

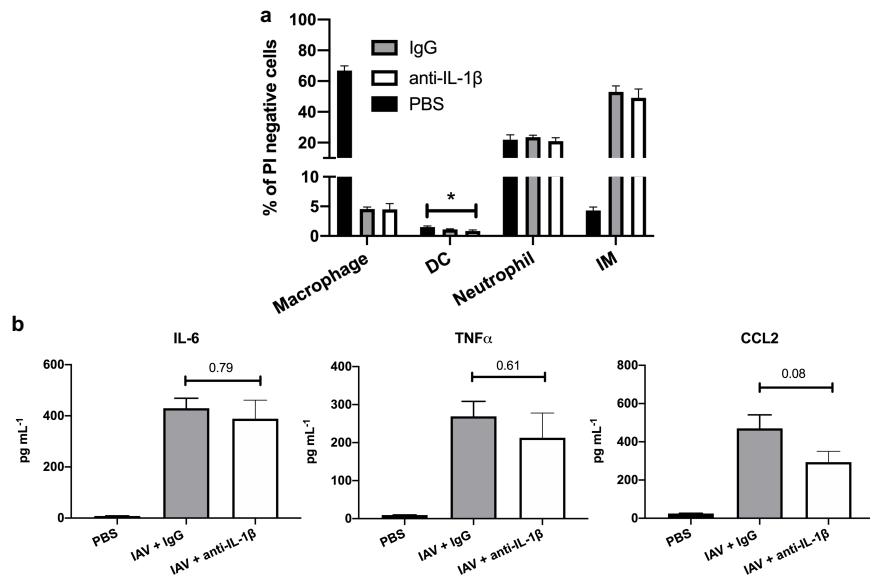

**Supplementary Figure 2. (a-b)** C57BL/6 mice were intranasally treated with anti-IL-1 $\beta$  antibody or IgG antibodies on day 3 following infection with  $10^5$  PFU of HKx31 (IAV). Control uninfected mice received intranasal PBS alone (PBS). On day 4 post-infection, disease parameters were examined. **(a)** Frequency of Ly6G<sup>+</sup> neutrophils, Ly6C<sup>+</sup> inflammatory macrophages (IM), CD11c<sup>+</sup> I-A<sup>b</sup> high dendritic cells (DC) and CD11c<sup>+</sup> I-A<sup>b</sup> low macrophages in BAL determined by flow cytometry. \*  $P < 0.05$ , One-way ANOVA. **(b)** Concentration of IL-6, TNF $\alpha$ , CCL2 in in BAL fluids determined by cytokine bead array.  $P$ -values are shown IgG vs anti-IL-1 $\beta$ ; One-way ANOVA. Levels of IL-6, TNF $\alpha$ , CCL2 were significantly increased in both IAV-infected groups in comparison to uninfected PBS controls ( $P < 0.01$ ). **(a-b)** Data represents the mean  $\pm$  SEM and is representative of 2 independent experiments which were pooled.  $n = 8$ .

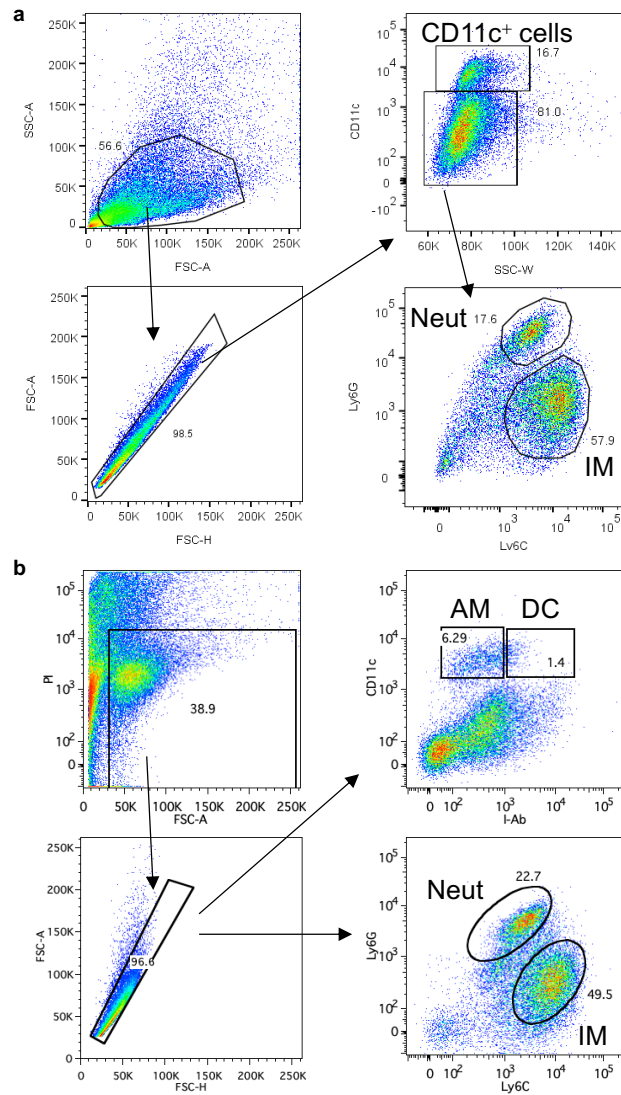

**Supplementary Figure 3. (a)** Flow cytometry gating strategy to examine intracellular pro-IL-1 $\beta$  and pro-IL-18 expression in CD11c<sup>+</sup> cells, Ly6G<sup>+</sup> neutrophils (Neut) and Ly6C<sup>+</sup> inflammatory macrophages (IM) in the BAL. **(b)** Flow cytometry gating strategy to numerate numbers of PI<sup>-</sup> CD11c<sup>+</sup> I-A<sup>b</sup> low alveolar macrophages, CD11c<sup>+</sup> I-A<sup>b</sup> high dendritic cells, Ly6G<sup>+</sup> neutrophils and Ly6C<sup>+</sup> inflammatory macrophages in the BAL.
